# Supplementary material
Source: Springer Nature journal article supplement (https://www.springermedizin.de/resource/supplementary/13048_2013_159_MOESM2_ESM.pdf/9665024)

Serum Vitamin D (ng/ml)

60.00  
40.00  
20.00  
0.00

Cases

Controls

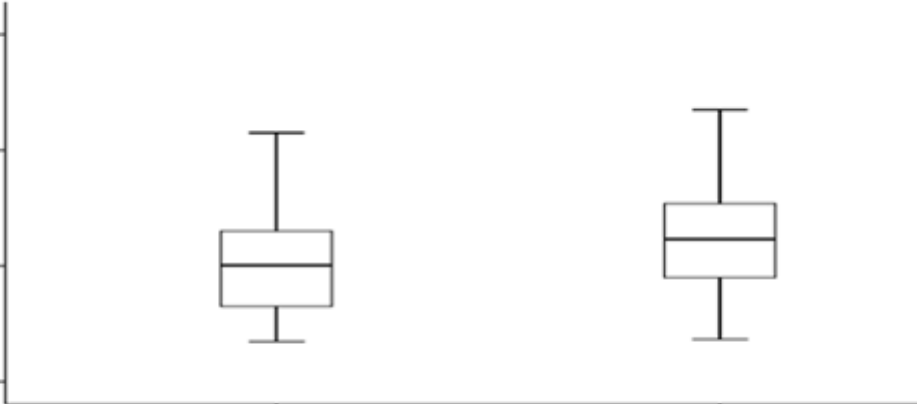

Supplement: MOESM2 [file 9665024]
